# Supplementary material for: SiMYBS3, Encoding a Setaria italica Heterosis-Related MYB Transcription Factor, Confers Drought Tolerance in Arabidopsis
Source: MDPI journal article supplement (doi:10.3390/ijms24065418), 2023-03-12
Supplement: s1 [file s1]

Table S1. Primer pairs used in the experiment

| Primer              | Sequence                                                       | Application                |
|---------------------|----------------------------------------------------------------|----------------------------|
| <i>SiMYBS3</i> - F1 | 5'-ATGACGCGGCGGTGCTCGCACTGCA -3'                               | Gene cloning               |
| <i>SiMYBS3</i> - R1 | 5'-TCAGGCCTGAGCCCTTGTTTGAGGATTT -3'                            |                            |
| <i>SiMYBS3</i> - F2 | 5'-ATTTGGAGAGAAACACGGGGGACTTTGCAACATGACGCGGCGGTGCTCGCACTGCA-3' | Subcellular localization   |
| <i>SiMYBS3</i> - R2 | 5'-GGAACCACTCCCTGAAGCGGCCGCTGTACAGGCCTGAGCCCTTGTTTGAGGATTT-3'  |                            |
| <i>SiMYBS3</i> - F3 | 5'-TCAGAGGAGGACCTGCATATGATGACGCGGCGGTGCTCGCACTGCA -3'          | Transcriptional activity   |
| <i>SiMYBS3</i> - R3 | 5'-TCGACGGATCCCCGGGAATTCTCAGGCCTGAGCCCTTGTTTGAGGATTT - 3'      |                            |
| <i>SiMYBS3</i> - F4 | 5'-TTCCGCTGTTGCAGAGAGTC - 3'                                   | Quantitative real-time PCR |
| <i>SiMYBS3</i> - R4 | 5'-TCGACATGCCCACAAGTTCATC -3'                                  |                            |
| <i>SiActin</i> - F  | 5'-CGCATATGTGGCTCTTGACT -3'                                    |                            |
| <i>SiActin</i> - R  | 5'-GGGCACCTAAATCTCTCGC -3'                                     |                            |
