# Supplementary material for: SiMYBS3, Encoding a Setaria italica Heterosis-Related MYB Transcription Factor, Confers Drought Tolerance in Arabidopsis
Source: MDPI journal article supplement (doi:10.3390/ijms24065418), 2023-03-12
Supplement: s1 [file s1]

Table S2.

18 genes involved in the response to drought stress and heterosis

| <b>Gene ID</b> | <b>Annotation description</b>                                         |
|----------------|-----------------------------------------------------------------------|
| Seita.2G405500 | Serine/Threonine - protein kinase                                     |
| Seita.9G321800 | Transcription factor MYBS3                                            |
| Seita.5G308400 | UDP-glucuronosyl and UDP-glucosyl transferase                         |
| Seita.9G516500 | Ethylene-responsive transcription factor                              |
| Seita.3G126900 | RNA polymerase sigma-70                                               |
| Seita.3G136300 | Protein CHUP1, chloroplastic                                          |
| Seita.9G131700 | DUF1336 domain-containing protein                                     |
| Seita.9G391300 | Cytochrome P450                                                       |
| Seita.4G072300 | Phosphofructokinase domain                                            |
| Seita.3G375500 | Adaptor protein Enigma and related PDZ-LIM proteins                   |
| Seita.5G231500 | Serine/threonine - protein kinase                                     |
| Seita.9G128600 | dihydroceramidase (ACER3, YDC1)                                       |
| Seita.5G177000 | de-etiolated-1 (DET1)                                                 |
| Seita.5G340900 | lysocardiolipin and lysophospholipid acyltransferase (LCLAT1, AGPAT8) |
| Seita.5G300000 | Serine O-acetyltransferase                                            |
| Seita.5G411200 | BTB and MATH domain -containing protein 42                            |
| Seita.5G330600 | E3 ubiquitin-protein ligase RNF5                                      |
| Seita.5G408100 | Expressed protein                                                     |
